# Supplementary material
Source: PubMed Central journal article supplement (PMC6102985)
Supplement: zam017188708s1.pdf [file zam017188708s1.pdf]

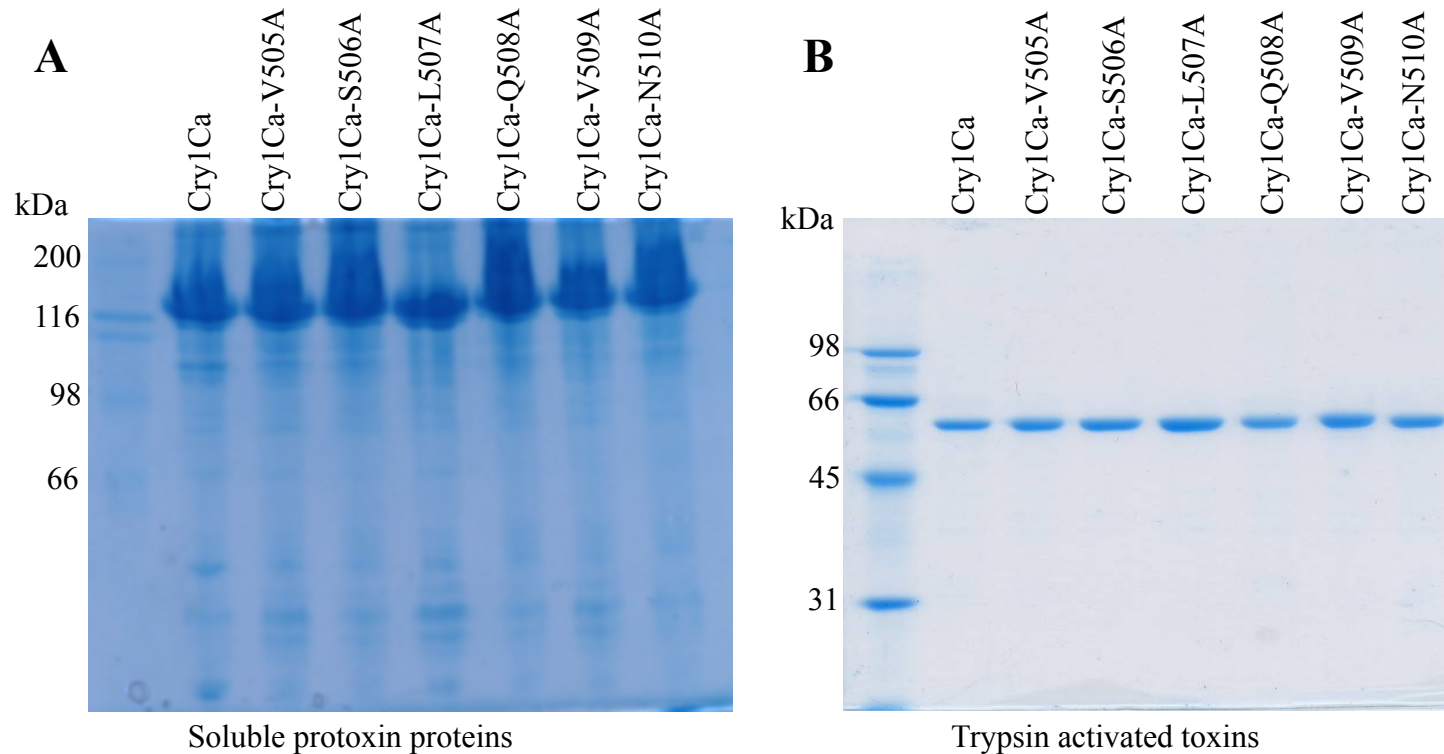

**Figure S1. Protoxins and trypsin-activated proteins of Cry1Ca and domain III mutants.**

Panel A, Crystals were solubilized in 50 mM  $\text{Na}_2\text{CO}_3/\text{NaHCO}_3$  buffer containing 0.02% mercaptoethanol, pH 10.5, at 37 °C for 1 h. Protein concentration of protoxins and toxins was determined by the Bradford method using BSA as a standard and samples were analyzed by SDS-PAGE using a 10 % acrylamide gel. Panel B, Soluble protoxins were proteolytic activated with 1: 50 trypsin at 37 °C for 1 h. Trypsin was inactivated with 1 mM phenylmethylsulfonyl fluoride (PMSF) and samples were analyzed by SDS-PAGE using a 10 % acrylamide gel.
